# Supplementary material for: The N-terminal PA Domains of Signal-Peptide-Peptidase-like 2 (SPPL2) Proteases impact on Tumor Necrosis Factor α (TNFα) Cleavage
Source: Research Square preprint supplement (doi:10.21203/rs.3.rs-5327067/v1), 2024-11-28
Supplement: Supplementary file 1 [file c270fc2084f0afb759ebde60.pdf]

**A**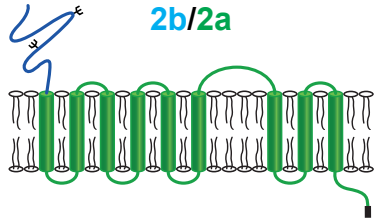

|            |            |            |            |                     |                   |
|------------|------------|------------|------------|---------------------|-------------------|
| 10         | 20         | 30         | 40         | 50                  | 60                |
| MAAAVAAALA | RLLAFLLLA  | AQVACEYGMV | HVVSQAGGPE | GKDYCILYNP          | QWAHLPHDLS        |
| 70         | 80         | 90         | 100        | 110                 | 120               |
| KASFLQLRNW | TASLLCSAAD | LPARGFSNQI | PLVARGNCTF | YEKVRLAQGS          | GARGLLIVSR        |
| 130        | 140        | 150        | 160        | 170                 | 180               |
| ERLVPPGGNK | TQYDEIGIPV | ALLSYKDMLD | IFTRFGRTVR | AAL <b>Y</b> SPSWPN | FDYTMVVIFV        |
| 190        | 200        | 210        | 220        | 230                 | 240               |
| IAVFTVALGG | YWSGLVELEN | LKAVTTEDRE | MRKKKEEYLT | FSPLTVVIFV          | VICCVMMVLL        |
| 250        | 260        | 270        | 280        | 290                 | 300               |
| YFFYKWLIVV | MIAIFCIASA | MSLYNCLAAL | IHKIPYGQCT | IACRGKNMEV          | RLIFLSGLCI        |
| 310        | 320        | 330        | 340        | 350                 | 360               |
| AVAVVWAVFR | NEDRWAWILQ | DILGIAFCLN | LIKTLKLPNF | KSCVILLGLL          | LLYDVFFVFI        |
| 370        | 380        | 390        | 400        | 410                 | 420               |
| TPFITKNGES | IMVELAAGPF | GNNEKLPVVI | RVPKLIYFSV | MSVCLMPVSI          | <u>LGFGDIIVPG</u> |
| 430        | 440        | 450        | 460        | 470                 | 480               |
| LLIAYCRRFD | VQTGSSYIYY | VSSTVAYAIG | MILTFVVLVL | <u>MKKGQPALLY</u>   | LVPCTLITAS        |
| 490        | 500        | 510        | 520        | 530                 |                   |
| VVAWRRKEMK | KFWKGNSYQM | MDHLDCATNE | ENPVISGEQI | VQQAYPYDVP          | DYA               |

**B**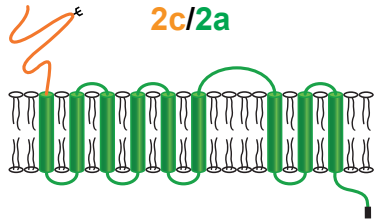

|                   |            |            |            |            |                   |
|-------------------|------------|------------|------------|------------|-------------------|
| 10                | 20         | 30         | 40         | 50         | 60                |
| MACLGFLLPV        | GFLLLISTVA | GGKYGVAHV  | SENWSKDYCI | LFSSDYITLP | RDLHHAPLLP        |
| 70                | 80         | 90         | 100        | 110        | 120               |
| LYDGTAPWC         | PGEDSPHQAQ | LRSPSQRP   | QTTAMVMRGN | CSFHTKGWLA | QGQGAHGLLI        |
| 130               | 140        | 150        | 160        | 170        | 180               |
| VSRVSDQQCS        | DTTLAPQDPR | QPLADLTIPV | AMLHYADM   | ILSHTRGEAV | VRVAMY <b>PSW</b> |
| 190               | 200        | 210        | 220        | 230        | 240               |
| PNFDYTMVVI        | FVIAVFTVAL | GGYWSGLVEL | ENLKAVTTED | REMRKKKEEY | LTFSPSTVVI        |
| 250               | 260        | 270        | 280        | 290        | 300               |
| FVVICCVMMV        | LLYFFYKWL  | YVMIAIFCIA | SAMSLYNCLA | ALIHKIPYGQ | CTIACRGKNM        |
| 310               | 320        | 330        | 340        | 350        | 360               |
| EVRLIFLSGL        | CIAVAVVWAV | FRNEDRWAWI | LQDILGIAFC | LNLIKTLKLP | NFKSCVILLG        |
| 370               | 380        | 390        | 400        | 410        | 420               |
| LLLLYDVFFV        | FITPFITKNG | ESIMVELAAG | PFGNNEKLPV | VIRVPKLIYF | SVMSVCLMPV        |
| 430               | 440        | 450        | 460        | 470        | 480               |
| <u>SILGFGDIIV</u> | PGLLIAYCRR | FDVQTGSSYI | YYVSSTVAYA | IGMILTFVVL | <u>VLMKKGQPAL</u> |
| 490               | 500        | 510        | 520        | 530        | 540               |
| <u>LYLVPCTLIT</u> | ASVVAWRRKE | MKKFWKGNSY | QMDHLDCAT  | NEENPVISGE | QIVQQAYPYD        |
|                   |            |            |            |            |                   |
|                   |            |            |            |            | VPDYA             |

**C**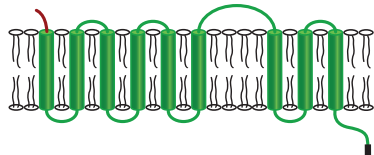

|                   |                   |            |            |            |            |
|-------------------|-------------------|------------|------------|------------|------------|
| 10                | 20                | 30         | 40         | 50         | 60         |
| MAEQTYSWAY        | SLVDYTMVVI        | FVIAVFTVAL | GGYWSGLVEL | ENLKAVTTED | REMRKKKEEY |
| 70                | 80                | 90         | 100        | 110        | 120        |
| LTFSPSTVVI        | FVVICCVMMV        | LLYFFYKWL  | YVMIAIFCIA | SAMSLYNCLA | ALIHKIPYGQ |
| 130               | 140               | 150        | 160        | 170        | 180        |
| CTIACRGKNM        | EVRLIFLSGL        | CIAVAVVWAV | FRNEDRWAWI | LQDILGIAFC | LNLIKTLKLP |
| 190               | 200               | 210        | 220        | 230        | 240        |
| NFKSCVILLG        | LLLLYDVFFV        | FITPFITKNG | ESIMVELAAG | PFGNNEKLPV | VIRVPKLIYF |
| 250               | 260               | 270        | 280        | 290        | 300        |
| SVMSVCLMPV        | <u>SILGFGDIIV</u> | PGLLIAYCRR | FDVQTGSSYI | YYVSSTVAYA | IGMILTFVVL |
| 310               | 320               | 330        | 340        | 350        | 360        |
| <u>VLMKKGQPAL</u> | <u>LYLVPCTLIT</u> | ASVVAWRRKE | MKKFWKGNSY | QMDHLDCAT  | NEENPVISGE |
| 370               |                   |            |            |            |            |
| QIVQQAYPYD        | VPDYA             |            |            |            |            |

**Suppl. Figure 1: SPPL2a chimeric proteases.** Schematic representation (left) and corresponding amino acid sequences in single letter code (right) of SPPL2b/2a (**A**), SPPL2c/2a (**B**) and SPPL3/2a (**C**). Protein domains of SPPL2a are depicted in green, those of SPPL2b in blue, SPPL2c in orange and SPPL3 in red. The HA-tag is illustrated as black box or in black letters, respectively. Bold letters indicate the amino acid shared in both proteases at the domain boarder. YD, GxGD, and PAL motifs are underlined.

**A**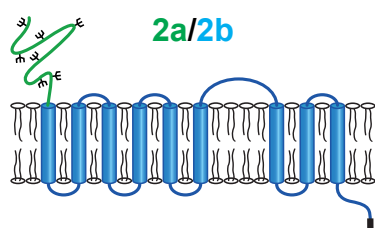

|            |            |            |            |                    |                    |
|------------|------------|------------|------------|--------------------|--------------------|
| 10         | 20         | 30         | 40         | 50                 | 60                 |
| MGPQRRLSPA | GAALLWGFL  | QLTAAQEAIL | HASNGTTKD  | YCMLYNPYWT         | ALPSTLENAT         |
| 70         | 80         | 90         | 100        | 110                | 120                |
| SISLMNLTST | PLCNLSDIPP | VGIKSKAVVV | PWGSCHFLEK | ARIAQKGGAE         | AMLVVNNSVL         |
| 130        | 140        | 150        | 160        | 170                | 180                |
| FPPSGNRSEF | PDVKILIAFI | SYKDFRDMNQ | TLGDNITVKM | <b>Y</b> APKEPVLDY | NMVIIFIMAV         |
| 190        | 200        | 210        | 220        | 230                | 240                |
| GTVAIGGYWA | GSRDVKKRYM | KHKRDDGPEK | QEDEAVDVTP | VMTCVFVVMC         | CSMLVLLYYF         |
| 250        | 260        | 270        | 280        | 290                | 300                |
| YDLLVYVVG  | IFCLASATGL | YSCLAPCVRR | LPFGKCRIPN | NSLPYFHKRP         | QARMLLLALF         |
| 310        | 320        | 330        | 340        | 350                | 360                |
| CVAVSVVWG  | FRNEDQWAW  | LQDALGIAFC | LYMLKTIRLP | TFKACTLLLL         | <u>VLFLYD</u> IFFV |
| 370        | 380        | 390        | 400        | 410                | 420                |
| FITPFLTKSG | SSIMVEVATG | PSDSATREKL | PMVLKVPRLN | SSPLALCDRP         | <u>FSL</u> LGFDIL  |
| 430        | 440        | 450        | 460        | 470                | 480                |
| VPGLLVAYCH | RFDIQVQSSR | VYFVACTIAY | GVGLLVTFVA | <u>LALMQR</u> GQPA | <u>LLYLVP</u> CTLV |
| 490        | 500        | 510        | 520        | 530                | 540                |
| TSCAVALWRR | ELGVFWTGS  | FAKVLPPSPW | APAPADGPQP | PKDSATPLSP         | QPPSEEPATS         |
| 550        | 560        | 570        | 580        | 590                |                    |
| PWPAEQSPKS | RTSEEMGAGA | PMREPGSPAE | SEGRDQAQPS | PVTQPGASAA         | YPYDVDPDYA         |

**B**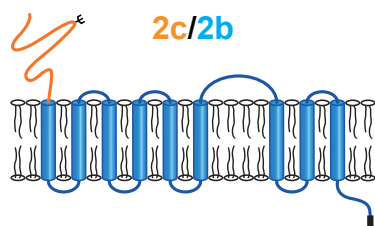

|                   |                   |            |            |            |                     |
|-------------------|-------------------|------------|------------|------------|---------------------|
| 10                | 20                | 30         | 40         | 50         | 60                  |
| MACLGFLLPV        | GFLLLISTVA        | GGKYGVAHV  | SENWSKDYCI | LFSSDYITLP | RDLHHAPLLP          |
| 70                | 80                | 90         | 100        | 110        | 120                 |
| LYDGTKAPWC        | PGEDSPHQAQ        | LRSPSQRP   | QTTAMVMRGN | CSFHTKGWLA | QGQGAHGLLI          |
| 130               | 140               | 150        | 160        | 170        | 180                 |
| VSRVSDQQCS        | DTTLAPQDPR        | QPLADLTIPV | AMLHYADMLD | ILSHTRGEAV | VRVAM <b>Y</b> APKE |
| 190               | 200               | 210        | 220        | 230        | 240                 |
| PVLDMNMVII        | FIMAVGTVAI        | GGYWAGSRDV | KKRYMKHKRD | DGPEKQEDEA | VDVTPVMTCV          |
| 250               | 260               | 270        | 280        | 290        | 300                 |
| FVVMCCSMLV        | LLYYFYDLLV        | YVIGIFCLA  | SATGLYSCLA | PCVRRLPFGK | CRIPNNSLPY          |
| 310               | 320               | 330        | 340        | 350        | 360                 |
| FHKRPQARML        | LLALFCVAVS        | VWVGVRNED  | QWAWVLQDAL | GIAFCLYMLK | TIRLPTFKAC          |
| 370               | 380               | 390        | 400        | 410        | 420                 |
| <u>TLLLLVLFLY</u> | <u>DIFFVFITPF</u> | LTKSGSSIMV | EVATGPSDSA | TREKLPMVLK | VPRLNSSPLA          |
| 430               | 440               | 450        | 460        | 470        | 480                 |
| LCDRPFSLLG        | FGDILVPGLL        | VAYCHRFDIQ | VQSSRVYFVA | CTIAYGVGLL | VTFVALALMQ          |
| 490               | 500               | 510        | 520        | 530        | 540                 |
| <u>RGQPALLYLV</u> | <u>PCTLVTSCAV</u> | ALWRRELGVF | WTGSGFAKVL | PPSPWAPAPA | DGPQPPKDSA          |
| 550               | 560               | 570        | 580        | 590        | 600                 |
| TPLSPQPPSE        | EPATSPWPAE        | QSPKSRTSEE | MGAGAPMREP | GSPAESEGRD | QAQPSPTQPF          |
| 610               |                   |            |            |            |                     |
| GASAAYPYDV        | PDYA              |            |            |            |                     |

**C**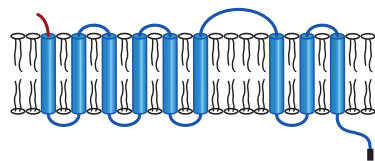

|            |                   |                   |            |            |            |
|------------|-------------------|-------------------|------------|------------|------------|
| 10         | 20                | 30                | 40         | 50         | 60         |
| MAEQTYSWAY | SLVDYNMVII        | FIMAVGTVAI        | GGYWAGSRDV | KKRYMKHKRD | DGPEKQEDEA |
| 70         | 80                | 90                | 100        | 110        | 120        |
| VDVTPVMTCV | FVVMCCSMLV        | LLYYFYDLLV        | YVIGIFCLA  | SATGLYSCLA | PCVRRLPFGK |
| 130        | 140               | 150               | 160        | 170        | 180        |
| CRIPNNSLPY | FHKRPQARML        | LLALFCVAVS        | VWVGVRNED  | QWAWVLQDAL | GIAFCLYMLK |
| 190        | 200               | 210               | 220        | 230        | 240        |
| TIRLPTFKAC | <u>TLLLLVLFLY</u> | <u>DIFFVFITPF</u> | LTKSGSSIMV | EVATGPSDSA | TREKLPMVLK |
| 250        | 260               | 270               | 280        | 290        | 300        |
| VPRLNSSPLA | LCDRPFSLLG        | FGDILVPGLL        | VAYCHRFDIQ | VQSSRVYFVA | CTIAYGVGLL |
| 310        | 320               | 330               | 340        | 350        | 360        |
| VTFVALALMQ | <u>RGQPALLYLV</u> | <u>PCTLVTSCAV</u> | ALWRRELGVF | WTGSGFAKVL | PPSPWAPAPA |
| 370        | 380               | 390               | 400        | 410        | 420        |
| DGPQPPKDSA | TPLSPQPPSE        | EPATSPWPAE        | QSPKSRTSEE | MGAGAPMREP | GSPAESEGRD |
| 430        | 440               |                   |            |            |            |
| QAQPSPTQPF | GASAAYPYDV        | PDYA              |            |            |            |

**Suppl. Figure 2: SPPL2b chimeric proteases.** Schematic representation (left) and corresponding amino acid sequences in single letter code (right) of SPPL2a/2b (**A**), SPPL2c/2b (**B**) and SPPL3/2b (**C**). Protein domains of SPPL2a are depicted in green, those of SPPL2b in blue, SPPL2c in orange and SPPL3 in red. The HA-tag is illustrated as black box or in black letters, respectively. Bold letters indicate the amino acid shared in both proteases at the domain boarder. YD, GxGD, and PAL motifs are underlined.

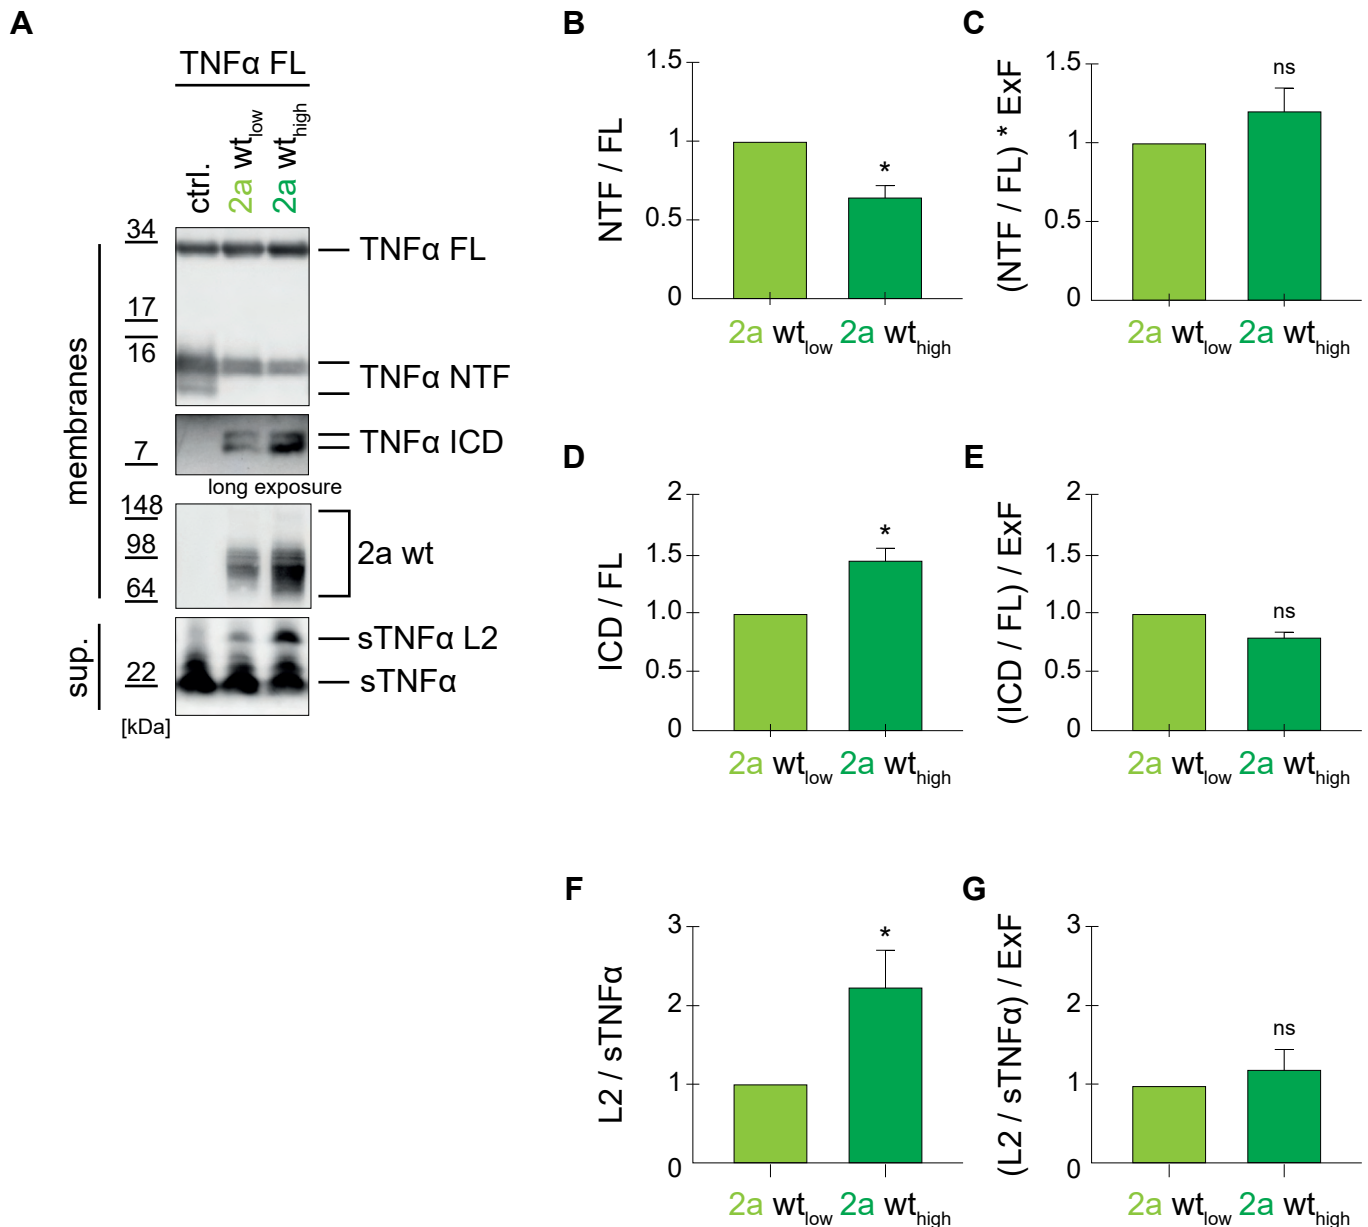

**Suppl. Figure 3: Mathematical relation between SPPL2a wt expression and TNFα processing.** Densitometric quantification confirms a linear dependency between TNFα NTF reduction, TNFα ICD production, sTNFα L2 production and SPPL2a wt expression. (A) DKO cells (ctrl.) with either low (2a wt<sub>low</sub>) or strong (2a wt<sub>high</sub>) exogenous expression of SPPL2a wt were transiently transfected with full length TNFα (TNFα FL). Membrane bound TNFα species were analyzed on Western Blot using the anti-FlagM2 antibody. An antibody against the HA-tag (3F10) was used to detect SPPL2a wt expression. Soluble TNFα species were detected from Western Blot of conditioned media (sup.) with the monoclonal V5 antibody. (B) Densitometric quantification of TNFα NTF, as depicted in (A). Normalization to TNFα FL eliminated transfection variations. Resulting values were normalized to the low expressing 2a wt protease sample. Note that high SPPL2a wt expression results in a significantly stronger reduction of TNFα NTF. (C) Before normalization to SPPL2a wt<sub>low</sub>, values as depicted in (B) were multiplied with an expression factor (ExF) accounting for the expression difference between high and low protease expression. Note that this results in non-significant differences, indicating linearity between protease expression and TNFα NTF reduction. (D) Densitometric quantification of TNFα ICD, as depicted in (A). Normalization to TNFα FL eliminated transfection variations. Resulting values were all normalized to the low expressing 2a wt protease sample. Note that high SPPL2a wt expression results in a significantly stronger production of TNFα ICD. (E) Before normalization to SPPL2a wt<sub>low</sub>, values as depicted in (D) were divided by an expression factor (ExF) accounting for the expression difference between high and low protease expression. Note that this results in non-significant differences, indicating linearity between protease expression and TNFα ICD production. (F) Densitometric quantification of non-canonical TNFα shedding products (sTNFα L2) generated by SPPL2a wt as depicted in (A). Normalization to the ADAM-generated TNFα shedding product (sTNFα) eliminated transfection variations. Resulting values were all normalized to the low expressing 2a wt protease sample. Note that high SPPL2a wt expression results in a significantly stronger secretion of sTNFα L2. (G) Before normalization to SPPL2a wt<sub>low</sub>, values as depicted in (F) were divided by an expression factor (ExF) accounting for expression difference between high and low protease expression. Note that this results in non-significant differences, indicating linearity between protease expression and sTNFα secretion. (B-G) Mean + SEM, unpaired, two-tailed one sample t-tests of log-transformed (log<sub>2</sub>) values. ns=not significant, \*p < 0.05; B-C: n=4, D-E: n=3, F-G: n=4. The ExF is the mean (n=4) of the ratio between the expression of high and low expressing SPPL2a wt proteases.

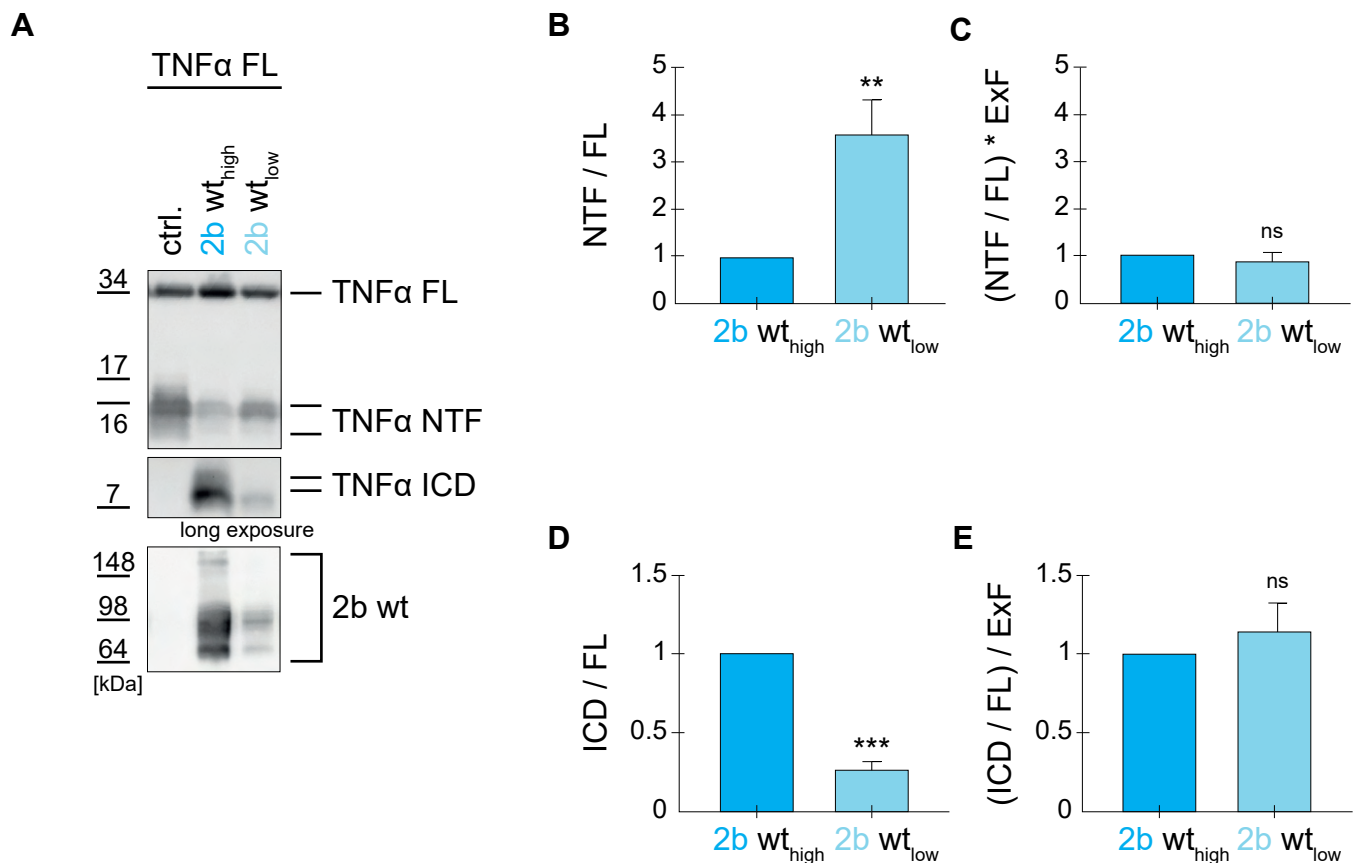

**Suppl. Figure 4: Mathematical relation between SPPL2b wt expression and TNFα processing.** *Densitometric quantification confirms a linear dependency between TNFα NTF reduction, TNFα ICD production and SPPL2b wt expression. (A-E)* Experiments were carried out as described in Suppl. Figure 3, but using cells with different expression levels of SPPL2b wt and values were normalized to the high expressing SPPL2b wt sample. *Note that without consideration of the protease expression the low expressing SPPL2b wt cells show significantly reduced TNFα NTF turnover and TNFα ICD production. Significance is lost upon inclusion of ExF. (B-E)* Mean + SEM, unpaired, two-tailed one sample t-tests of log-transformed ( $\log_2$ ) values. ns=not significant, \*\* $p < 0.01$ , \*\*\* $p < 0.005$ ,  $n=5$ . The ExF is the mean ( $n=5$ ) of the ratio between the expression of low and high expressing SPPL2b wt proteases.

**A**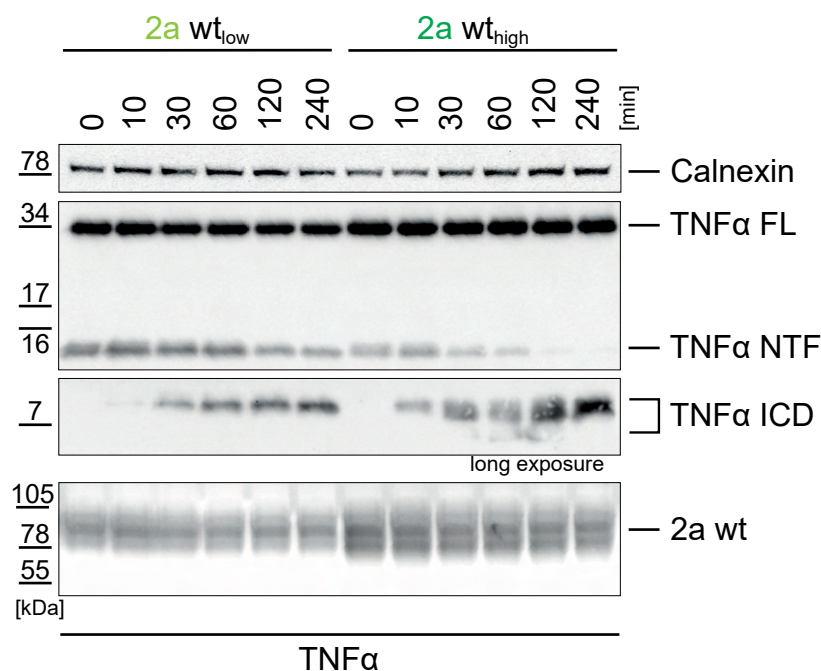**B**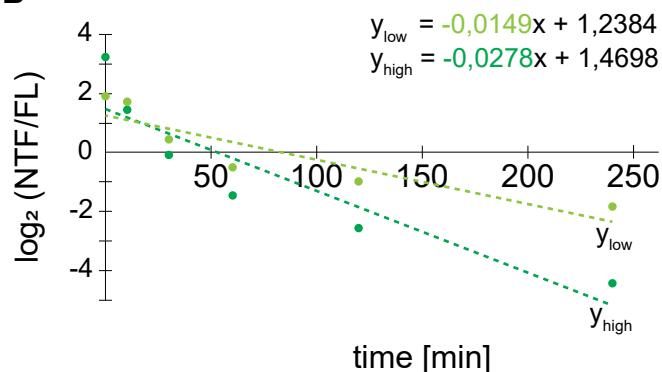**C**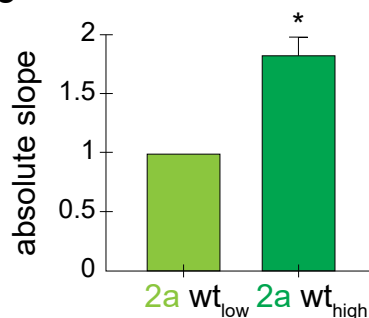**D**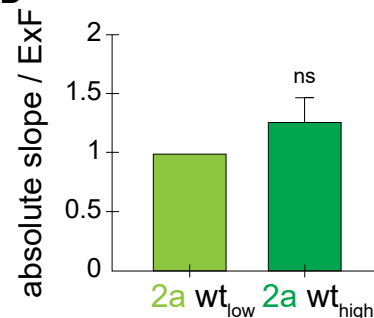

**Suppl. Figure 5: Mathematical relation between SPPL2a wt expression and kinetics of TNFα NTF turnover.** Densitometric quantification confirms a linear dependency between time dependent TNFα NTF reduction and SPPL2a wt protease expression level. (A) DKO cells (ctrl.) with either low (2a wt<sub>low</sub>) or strong (2a wt<sub>high</sub>) exogenous expression of SPPL2a wt were transiently transfected with full length TNFα (TNFα FL). Membrane fractions were incubated at 37 °C, and TNFα species were detected at the indicated time points on Western Blot using the Flag M2 antibody. An antibody against the HA-tag (3F10) was used to detect SPPL2a wt expression. Calnexin serves as a loading control. (B) Densitometric quantification of the TNFα NTF amount over time as depicted in (A). TNFα NTF at every time point was normalized to the respective Calnexin value to eliminate variations in loading. The logarithmic values ( $\log_2$ ) of the result were plotted against time. The regression curves are displayed as dotted lines for  $y_{\text{low}}$  (SPPL2a wt<sub>low</sub>) and  $y_{\text{high}}$  (SPPL2a wt<sub>high</sub>). The corresponding slopes are marked in green. (C) The mean absolute slopes of 3 independent experiments as shown in (A) were depicted relative to the slope of samples from SPPL2a wt<sub>low</sub>. Note that high SPPL2a wt expression results in a significantly higher absolute slope. (D) Values as depicted in (C) but expression differences between high and low expressing proteases are eliminated by division with the ExF before normalization to SPPL2a wt<sub>low</sub>. Note that this results in only non-significant differences, indicating linearity between protease expression and the slope, that reflects TNFα NTF reduction over time. (C&D) Mean + SEM, unpaired, two-tailed one sample t-tests of log-transformed ( $\log_2$ ) values. ns= not significant, \*p < 0.05, n=3. The ExF is the mean (n=3) of the ratio between the expression of high and low expressing SPPL2a wt proteases.

**A**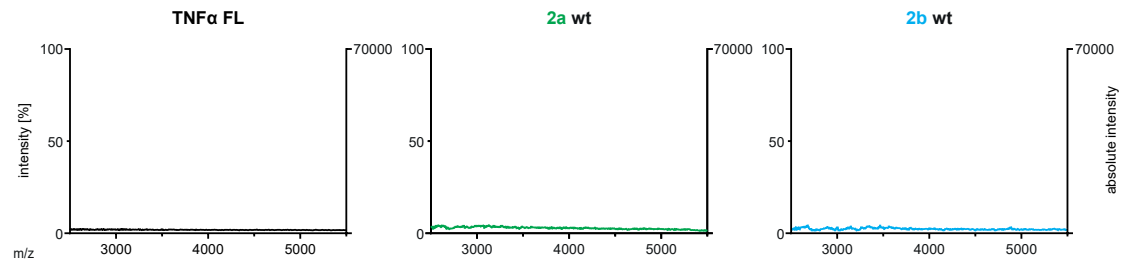**B**

| ICD<br>(cleavage<br>position) | predicted<br>mass<br>[Da] | measured mass<br>[Da] |       |       |      |
|-------------------------------|---------------------------|-----------------------|-------|-------|------|
|                               |                           | 2a wt                 | 2b/2a | 2c/2a | 3/2a |
| P18                           | 3058                      | 3065                  | 3063  | 3062  | 3064 |
| G26                           | 3811                      | 3816                  | 3815  | 3814  | 3816 |
| R28                           | 4055                      | 4054                  | 4053  | 4052  | 4053 |
| L39                           | 5383                      | 5383                  | 5383  | 5383  | 5383 |
|                               |                           | 2b wt                 | 2a/2b | 2c/2b | 3/2b |
|                               |                           |                       |       |       |      |
| P18                           | 3058                      | 3064                  | 3066  | 3064  | 3065 |
| G26                           | 3811                      | 3816                  | 3819  | 3819  | 3816 |
| R28                           | 4055                      | 4053                  | 4054  | 4053  | 4054 |
| L39                           | 5383                      | 5383                  | 5383  | 5383  | 5383 |

**Suppl. Figure 6: Empty controls and peak sizes**, related to Figure 8. **(A)** Negative controls for mass spectrometry. DKO (ctrl.) cells were transiently transfected with full length TNFα (TNFα FL) or stably expressed either only SPPL2a wt (2a wt) or SPPL2b wt (2b wt). Mass spectrometric analysis of TNFα ICD species was carried out as in Fig. 8. No background peaks were detected. **(B)** Table of predicted and experimentally determined masses. Single letter code and numbers indicate position of the most N-terminal amino acid of the respective TNFα cleavage product.
